# Supplementary material for: Layers of immunity: Deconstructing the Drosophila effector response
Source: eLife. 2025 Nov 5;14:RP107030. doi: 10.7554/eLife.107030 (PMC12588608; doi:10.7554/eLife.107030)
Supplement: Figure 3—figure supplement 1—source data 1. [file elife-107030-fig3-figsupp1-data1.xlsx]

## Sheet: Sheet1
	Microbe	AMP14	Bom		IMD	TOLL	Phag	Mel
Viruses	DCV	✓	✕		✓	(✓ IM)	✕	✓
	FHV	✓	✓		✓	✓	✓	✓
	DXV	✓	✕		✓	✓	✓	✓
	IIV-6	✓	✕		✓	(✓ I)	✕	✓
	SINV	✕	✕		(✓ T, P)	(✓ I)	✓	✓
Fungi	A. fumigatus (NI)	✕	✕		(✓ T)	(✓ I, M)	✕	(✓ T)
	B. bassiana (NI)	✓	✕		(✓ P)	(✓ I, M)	(✓ I, M)	(✓ T, P)
	B. bassiana (SI)	✕	✓		✕	✓	✓	✕
	C. albicans (SI)	✓	✕		(✓ T)	✓	✕	(✓ T)
Gram positive bacteria	M. marinum	✕	✕		✕	✕	✕	✕
	C. diphteriae	✕	✕		(✓ T)	(✓ I, M)	✕	✓
	M. luteus	✕	✕		(✓ T)	(✓ I)	✕	✕
	S. pneumoniae	✕	✕		✕	✕	✕	✕
	E. faecalis	✕	✓		✕	✓	(✓ M)	(✓ P)
	S. aureus	✕	✕		✕	✓	✓	✓
	L. monocytogenes	✕	✓		✓	✓	✕	✕
	B. subtilis	✓	✓		✓	✓	✕	(✓ T)
Gram negative bacteria	V. parahemolyticus	✓	✕		✓	✓	✕	✕
	P. rettgeri	✓	✕		✓	✓	✓	✓
	P. burhodogranaria	✓	✕		✓	(✓ M)	✕	✓
	Ecc15	✓	✓		✓		✓	✕
	K. pneumoniae	✓	✕		✓		✕	✕
	E. cloacae	✓	✕		✓	✕	✕	✕
	E. coli	✓	✕		✓	(✓ I)	✓	✕
	S. enterica typhimurium	✓	✕		✓	(✓ I)	(✓ I)	✕
