# Supplementary material for: Layers of immunity: Deconstructing the Drosophila effector response
Source: eLife. 2025 Nov 5;14:RP107030. doi: 10.7554/eLife.107030 (PMC12588608; doi:10.7554/eLife.107030)
Supplement: Figure 3—source data 1. [file elife-107030-fig3-data1.xlsx]

## Sheet: Fig3_4_new3
		Type	Species	Temp	Dose	Days	N exp	WT			∆AMP14		∆Bom			∆IMD		∆TOLL		∆Phag		∆Mel			∆Phag, ∆Mel		∆TOLL, ∆MelPPS		∆TOLL, ∆MelHP		∆IMD, ∆Mel		∆IMD, ∆Phag		∆IMD, ∆TOLL			∆ITPM
		Controls	Unchallenged	25°C	n/a	7	13	6.89831	177		6.9	60	6.9	60		6.81	100	6.8125	80	6.61667	60	7	116		6.95	60	5.98333	60	6.8159	239	6.55	60	6.63333	60	6.8	60		5.8	80
			Clean Injury	25°C	n/a	7	36	6.73625	709		6.55	60	6.51667	60		6.74217	543	6.64615	260	6.81452	248	6.36692	526		5.2807	57	4.61972	71	5.37143	70	4.70149	67	6.53333	60	6.23333	60		5.50225	445
			Clean Injury	29°C	n/a	7	11	6.59242	211		6.45	60	5.91667	60		6.28	100	6.08	75	6.55	60	6.36134	119		4.89583	96	2.97015	67	4.82143	56	3.68421	57	5.98438	64	5.6	60		3.89362	94
			Clean Injury	25°C	n/a	10	36	9.56486	709		9.13333	60	9.16667	60		9.24221	543	9.33962	260	9.59037	248	8.45086	526		6.17544	57	5.22535	71	6.25714	70	5.58209	67	9.13333	60	8.66667	60		6.34139	445
			Unchallenged	29°C	n/a	10	11	9.93525	139		9.26667	60	9.51667	60		8.91667	60	7.11765	34	9.275	40	9.21667	60		8.73333	60	5.9375	64	9.3	40	8.48333	60	9.11667	60	9.44898	49		7.67213	61
		Viruses	Drosophila C virus	25°C	2000 TCID50	10	5	8.27778	100		6.71429	89	7.70732	85		6.81818	73	7.84722	83	8.12821	78	6.29333	86		6.3253	88	5.46	56	5	92	5.13636	60	6.68085	64	3.8	53		4.125	78
			Flock House virus	25°C	250000 TCID50	10	5	8.54918	122		7.13699	73	7.19048	84		7.27848	79	7.25974	77	7.32099	81	6.86585	82		6.18293	82	5.05357	56	6.04706	85	4.91803	61	6.79452	73	5.20339	59		5.05952	84
			Drosophila X virus	25°C	431000 TCID50	10	2	9.025	40		6.86111	41	8.15789	20		7.11111	45	7.89655	34	7.8	41	5.36842	38		7.44444	46	4.90625	37	5.08333	38	6	15	6.16667	40	5.63158	19		4.62791	43
			Invertebrate iridescent-6 virus	25°C	31700 TCID50	10	3	9.38182	59		7.46667	50	9.35593	64		8.07273	58	8.3617	54	8.78261	60	5.64	58		6.03448	61	5.76471	59	5.82222	58	6.13158	48	8.27907	54	5.85	47		4.41379	69
			Sindbis virus	25°C	50000 TCID50	10	3	9.37037	58		8.43636	61	8.63158	61		8.90566	60	8.78846	60	8.27778	60	5.42105	65		5.89831	66	4.93333	51	4.80488	59	4.51111	60	6.96154	50	4.5122	45		4.32759	61
		Fungi	Aspergillus fumigatus (natural)	29°C	rolled on plate	10	5	10	80		9.20253	81	9.9	20		8.75926	56	7.24359	81	7.56757	41	9.05085	60		8.23636	60	6.75926	62	8.56667	60	7.67241	60	8.72874	66	6.87719	60		4.66667	92
			Beauvaria bassiana (natural)	29°C	30mg	10	5	9.63248	120		8.22222	61	9.75	60		9.44828	60	7.27273	70	7.78571	43	8.72973	76		7.73214	60	5.03125	64	6	36	6.87805	66	6.38889	40	5	51		4.39286	62
			Beauvaria bassiana	29°C	OD=5	7	6	6.35526	81		5.95714	74	3.55932	59		5.69643	58	3.55385	66	5.21053	39	5.2963	62		4.42933	57	2.62712	59	3.40351	63	4.375	21	4.66667	51	3.14286	56		3.26744	95
			Candida albicans	29°C	OD=200	7	8	6.66242	160		5.1	23	5.58969	118		5.56061	66	3.71882	89	6.6	80	5.86667	60		6.44444	102	1.72222	20	2.79389	131	5.72222	36	5.88372	89	3.22222	27		2.37763	82
		Gram positive bacteria	Mycobacterium marinum	25°C	OD=1	7	6	6.10606	132		6.04	50	6.5098	51		6.5045	111	5.85185	108	5.16883	77	5.82828	99		5.67593	108	4.06452	62	5.75	84	5.11765	51	5.0625	64	6.32143	56		3.88889	117
			Corynebacterium diphteriae	25°C	OD=100	7	3	5.9589	73		6.22619	84	6.49485	97		5.55696	79	5.1125	80	6.62069	87	4.59756	82		5.84058	69	3.23404	47	3.3301	103	4.86111	72	5.92045	88	4.52459	61		2.96	75
			Micrococcus luteus	29°C	OD=200	7	8	6.71488	121		5.675	80	6.83333	60		6.24167	120	6.39865	148	6.47887	71	6.45679	81		5.64198	81	4.57353	68	6.4625	80	4.81818	77	6.30952	84	2.06373	102		2.07692	91
			Streptococcus pneumoniae	25°C	OD=0.3	7	3	6.78049	41		6.1	60	6.4	60		6.68852	61	6.61429	70	6.31667	60	6.21667	60		6.36667	60	5.68333	60	5.03279	61	5.13333	60	6.01667	60	5.45	60		4.52	50
			Enterococcus faecalis	25°C	OD=5	7	10	5.04615	130		4.54	100	2.06452	62		4.2377	122	1.76984	126	5.22785	79	5.10656	122		3.88158	76	1.63492	63	1.84314	102	4.19355	62	4.02532	79	1.39344	61		1.26733	101
			Staphylococcus aureus	25°C	OD=0.5	7	8	5.05042	119		4.82759	58	5.66667	21		4.23729	118	3.43836	73	3.63291	79	2.36986	73		1.88462	78	1.9625	80	2.04464	112	2.12821	78	4.08475	59	3.425	40		1.85057	87
			Listeria monocytogenes	25°C	OD=0.5	7	5	4.83516	91		4.74359	78	2.16667	60		2.33871	62	1.64286	112	4.56338	71	5.25	76		3.94872	78	2.05714	70	2.19178	73	3.5	88	3.26316	60	1.96774	62		1.58065	62
			Bacillus subtilis	25°C	OD=5	7	7	5.70833	120		3.325	40	4.05	20		3.99187	123	3.81513	119	5.96364	55	5.40909	110		4.5102	98	2.81159	69	2.71429	84	4.48684	76	5.4	20	2.14634	41		2.02469	81
		Gram negative bacteria	Vibrio parahemolyticus	25°C	OD=10	7	2	3.10345	58		1.09836	61	2.90323	62		1.09677	62	1.34286	70	2.84375	64	2.27143	70		3.22807	57	1.77941	68	1.92683	41	1	59	1.12698	63	1	58		1	64
			Providencia rettgeri	25°C	OD=0.1	7	7	5.46918	146		1.10526	57	5.08621	58		1.96154	78	4.41429	70	3.64	100	1.84211	95		1.47541	61	1.50667	75	5.3	40	1.26667	75	2.09677	62	1	21		1.4065	123
			Providencia burhodogranaria	25°C	OD=10	7	7	5.08696	161		1.72368	76	4.575	40		1.62069	58	4.625	88	4.90476	63	3.98387	124		4.2381	84	2.91803	61	4.9	60	1.30769	78	1	61	1.35	40		1.29412	68
			Pectobacterium carotovorum	29°C	OD=10	7	8	6.42384	151		1.45614	57	5.75	40		1.81982	111	5.75926	108	4.425	120	5.79	100		5.19608	102	4.66667	60	5.21667	60	1.81944	72	1.75	8	1.41935	62		1.4434	106
			Klebsiella pneumoniae	25°C	OD=1	7	4	6.7	80		1.39706	68	6.65306	98		1.40206	97	6.8	60	6.93333	60	5.81667	60		6.33333	60	3.925	80	6.93333	60	1.32203	59	2	56	1	33		1.32812	64
			Enterobacter cloacae	25°C	OD=10	7	8	6.5906	149		1.31325	83	6.73333	60		1	100	6.61111	90	6.68333	60	6.4	80		6.125	80	4.91803	61	5.79798	99	1.31507	73	1.02703	37	1.60656	61		1.21687	83
			Escherichia coli	25°C	OD=200	7	8	6.56738	141		5.03797	79	6.9	40		3.825	80	6.18571	70	5.4	20	5.46512	43		5.50588	85	3.93651	63	5.25397	63	3.8	60	4.61667	60	1.71429	70		1.61667	60
			Salmonella enterica ser. typhimurium	25°C	OD=200	7	4	6.6375	80		4.775	40	6.67	100		5.3125	80	6.3	40	6.4	40	6.325	40		6.55556	63	5.45	40	4.84375	64	4.72131	61	3.88889	18	2.67857	56		1.83824	68
