# Supplementary material for: Layers of immunity: Deconstructing the Drosophila effector response
Source: eLife. 2025 Nov 5;14:RP107030. doi: 10.7554/eLife.107030 (PMC12588608; doi:10.7554/eLife.107030)
Supplement: Supplementary file 1. [file elife-107030-supp1.xlsx]

## Sheet: Sheet1
	Type	Kingdom	Phylum	Class	Order	Family	Nucleic acid / Membrane	Species	Strain, Source, DOI of previous study	Inf. mode	Infection temperature	Used concentration	Growth temperature	Medium of culture
	Viruses	Bamfordvirae	Nucleocytoviricota	Megaviricetes	Pimascovirales	Iridoviridae	dsDNA+	Invertebrate iridescent-6 virus	gift from Ronald van Rij	intra-thoracique	25°C	31 700 TCID50	provided	provided
		Orthornavirae	nd	nd	nd	Birnaviridae	ssRNA+	Drosophila X virus	gift from Ronald van Rij	intra-thoracique	25°C	431 000 TCID50	provided	provided
		Orthornavirae	Pisuviricota	Pisoniviricetes	Picornavirales	Dicistroviridae	ssRNA+	Drosophila C virus	gift from Carla Saleh	intra-thoracique	25°C	2 000 TCID50	26°C	S2 cells in Schneider
		Orthornavirae	Kitrinoviricota	Magsaviricetes	Nodamuvirales	Nodaviridae	dsRNA+	Flock House virus	gift from Carla Saleh	intra-thoracique	25°C	250 000 TCID50	26°C	S2 cells in Schneider
		Orthornavirae	Kitrinoviricota	Alsuviricetes	Martelliirales	Togaviridae	ssRNA+	Sindbis virus	gift from Ronald van Rij	intra-thoracique	25°C	50 000 TCID50	provided	provided
	Fungi	Fungi	Ascomycota	Sacharomycete	Sacharomycetales	Sacharomycetacae	Beta-glucans	Candida albicans	ATCC 2001	septic	29°C	OD600= 200	37°C	YPG
			Ascomycota	Eurotiomycete	Eurotiales	Trychocomacae	Beta-glucans	Aspergillus fumigatus	doi: 10.7554/eLife.44341	natural	29°C	rolled on plate	37°C	Malt-agar
			Ascomycota	Sordaryomycete	Coricypitacae	Ophiocordycipitacae	Beta-glucans	Beauvaria bassiana		septic	29°C	OD600= 5	commercial	commercial
							Beta-glucans		R444	natural	29°C	30mg	commercial	commercial
	Gram positive bacteria	Bacteria	Actinomycetota	Actinomycetia	Mycobacteriales	Mycobacteriacae	mAGP-type	Mycobacterium marinum	1218R WT	intra-thoracique	25°C	OD600= 1	37°C	LB
			Actinomycetota	Actinomycetia	Mycobacteriales	Corynebacteriaceae	Lys-type	Corynebacterium diphtheriae	DSM 44123	septic	25°C	OD600= 100	37°C	LB
			Actinomycetota	Actinomycetia	Actinomycetales	Micrococcacae	Lys-type	Micrococcus luteus	doi: 10.7554/eLife.44341	septic	25°C	OD600= 200	29°C	LB
			Bacillota	Bacilli	Lactobacilliales	Streptococcacae	Lys-type	Streptococcus pneumoniae	D39V WT	septic	25°C	OD600= 0.3	37°C	LB
			Bacillota	Bacilli	Lactobacilliales	Enterococcacae	Lys-type	Entecoccus faecalis	254	septic	25°C	OD600= 5	37°C	LB
			Bacillota	Bacilli	Caryophanale	Staphylococcacae	Lys-type	Staphylococcus aureus	doi: 10.7554/eLife.44341	septic	25°C	OD600= 0.5	37°C	BHI
			Bacillota	Bacilli	Bacilliales	Listeriacae	DAP-type	Listeria monocytogenes	BUG 1600	septic	25°C	OD600= 0.5	37°C	LB
			Bacillota	Bacilli	Bacilliales	Bacillacae	DAP-type	Bacillus subtilis	168	septic	25°C	OD600= 5	37°C	BHI
	Gram negative bacteria	Bacteria	Pseudomonadota	Gammaproteobacteriacae	Pseudomonadales	Pseudomonadacae	DAP-type	Pseudomonas aeruginosa	PAO1	septic	25°C	OD600= 0.01	37°C	LB
			Pseudomonadota	Gammaproteobacteriacae	Vibrionales	Vibrionacae	DAP-type	Vibrio parahemolyticus		septic	25°C	OD600= 10	37°C	LB
			Pseudomonadota	Gammaproteobacteriacae	Enterobacteriales	Morgenallacae	DAP-type	Providencia rettgeri	Dmel	septic	25°C	OD600= 0.1	37°C	LB
			Pseudomonadota	Gammaproteobacteriacae	Enterobacteriales	Morgenallacae	DAP-type	Providencia burhodogranaria	B	septic	25°C	OD600= 10	37°C	LB
			Pseudomonadota	Gammaproteobacteriacae	Enterobacteriales	Enterobacteriacae	DAP-type	Pectobacterium carotovorum	Ecc15	septic	25°C	OD600= 10	37°C	LB
			Pseudomonadota	Gammaproteobacteriacae	Enterobacteriales	Enterobacteriacae	DAP-type	Klebsiella pneumoniae		septic	25°C	OD600= 1.0	37°C	LB
			Pseudomonadota	Gammaproteobacteriacae	Enterobacteriales	Enterobacteriacae	DAP-type	Enterobacter cloacae	Β12	septic	25°C	OD600= 10	37°C	LB
			Pseudomonadota	Gammaproteobacteriacae	Enterobacteriales	Enterobacteriacae	DAP-type	Escherichia coli	1106	septic	25°C	OD600= 200	37°C	LB
			Pseudomonadota	Gammaproteobacteriacae	Enterobacteriales	Enterobacteriacae	DAP-type	Salmonella enterica ser. typhimurium	doi: 10.7554/eLife.44341	septic	25°C	OD600= 200	37°C	LB
